# Supplementary material for: Integrating neuroimaging and gene expression data using the imaging transcriptomics toolbox
Source: PubMed Central journal article supplement — STAR Protoc. 2022 Apr 15;3(2):101315. doi: 10.1016/j.xpro.2022.101315 (PMC9036395; doi:10.1016/j.xpro.2022.101315), 2022-04-15
Supplement: mmc1.pdf [file mmc1.pdf]

### Table S1. Brain Regions order list. Related to step 1.

The following list shows the order of the regions expected, and used, by the Imaging Transcriptomics toolbox. If the provided input is a text file with the metric from the regions (e.g., average of the regions) this must follow this order. Please note that although we report all regions the toolbox uses only the brain regions from the left hemisphere (*L\_*xxx, indexes 1 to 41).

| <b>Region</b>              | <b>Index</b> |
|----------------------------|--------------|
| L_bankssts                 | 1            |
| L_caudalanteriorcingulate  | 2            |
| L_caudalmiddlefrontal      | 3            |
| L_cuneus                   | 4            |
| L_entorhinal               | 5            |
| L_fusiform                 | 6            |
| L_inferiorparietal         | 7            |
| L_inferiortemporal         | 8            |
| L_isthmuscingulate         | 9            |
| L_lateraloccipital         | 10           |
| L_lateralorbitofrontal     | 11           |
| L_lingual                  | 12           |
| L_medialorbitofrontal      | 13           |
| L_middletemporal           | 14           |
| L parahippocampal          | 15           |
| L_paracentral              | 16           |
| L_parsopercularis          | 17           |
| L_parsorbitalis            | 18           |
| L_parstriangularis         | 19           |
| L_pericalcarine            | 20           |
| L_postcentral              | 21           |
| L_posteriorcingulate       | 22           |
| L_precentral               | 23           |
| L_precuneus                | 24           |
| L_rostralanteriorcingulate | 25           |
| L_rostralmiddlefrontal     | 26           |
| L_superiorfrontal          | 27           |
| L_superiorparietal         | 28           |
| L_superiortemporal         | 29           |
| L_supramarginal            | 30           |
| L_frontalpole              | 31           |
| L_temporalpole             | 32           |
| L_transversetemporal       | 33           |
| L_insula                   | 34           |
| L_thalamusproper           | 35           |
| L_caudate                  | 36           |
| L_putamen                  | 37           |

|                            |    |
|----------------------------|----|
| L_pallidum                 | 38 |
| L_accumbensarea            | 39 |
| L_hippocampus              | 40 |
| L_amygdala                 | 41 |
| R_bankssts                 | 42 |
| R_caudalanteriorcingulate  | 43 |
| R_caudalmiddlefrontal      | 44 |
| R_cuneus                   | 45 |
| R_entorhinal               | 46 |
| R_fusiform                 | 47 |
| R_inferiorparietal         | 48 |
| R_inferiortemporal         | 49 |
| R_isthmuscingulate         | 50 |
| R_lateraloccipital         | 51 |
| R_lateralorbitofrontal     | 52 |
| R_lingual                  | 53 |
| R_medialorbitofrontal      | 54 |
| R_middletemporal           | 55 |
| R parahippocampal          | 56 |
| R_paracentral              | 57 |
| R_parsopercularis          | 58 |
| R_parsorbitalis            | 59 |
| R_parstriangularis         | 60 |
| R_pericalcarine            | 61 |
| R_postcentral              | 62 |
| R_posteriorcingulate       | 63 |
| R_precentral               | 64 |
| R_precuneus                | 65 |
| R_rostralanteriorcingulate | 66 |
| R_rostralmiddlefrontal     | 67 |
| R_superiorfrontal          | 68 |
| R_superiorparietal         | 69 |
| R_superiortemporal         | 70 |
| R_supramarginal            | 71 |
| R_frontalpole              | 72 |
| R_temporalpole             | 73 |
| R_transversetemporal       | 74 |
| R_insula                   | 75 |
| R_thalamusproper           | 76 |
| R_caudate                  | 77 |
| R_putamen                  | 78 |
| R_pallidum                 | 79 |
| R_accumbensarea            | 80 |

|               |    |
|---------------|----|
| R_hippocampus | 81 |
| R_amygdala    | 82 |
| brainstem     | 83 |
